# Supplementary material for: Norrish Type I surface photochemistry for butyrophenone on TiO2(110)
Source: Royal Society of Chemistry journal article supplement (doi:10.1039/c3cp44602f), 2013-01-01
Supplement: c3cp44602f.pdf [file c3cp44602f.pdf]

Supporting Information

Confirming lack of CO photo-evolution of butyrophenone on oxidized TiO<sub>2</sub>(110)

We observed CO photo-evolution ( $m/z$  28) from the sample holder on clean titania so it is necessary to use  $^{18}\text{O}_2$  to confirm the absence of butyrophenone induced carbonyl photo-desorption. We prepared an  $^{18}\text{O}$ -enriched surface of reduced  $\text{TiO}_2(110)$  by annealing the crystal in  $10^{-4}$  mbar  $^{18}\text{O}_2$  and then vacuum annealing to produce a reduced surface. We observe  $m/z$  107 in the butyrophenone monolayer ( $\alpha_2$ ) desorption peak, which suggests that mixing occurs between butyrophenone and lattice oxygen. Mixing also occurs in the monolayer ( $\alpha_2$ ) and complexed state ( $\alpha_3$ ) when  $^{18}\text{O}_2$  is used to prepare oxidized  $\text{TiO}_2(110)$  (Figure 2). Since we observe limited  $^{18}\text{O}$  mixing in the monolayer state and more mixing once photolyzed, the lack of mass 30, which would be due to  $\text{C}^{18}\text{O}$ , indicates that carbonyl photo-desorption is not a significant process. The lack of mass 30 PSD signal indicates that mass 28 is probably due to CO desorption from the sample holder and alkyl chain cracking ( $\text{C}_2\text{H}_4$ ). Further, the lack of mass 31 signal indicates that the mass 29 peak observed is not from HCO.

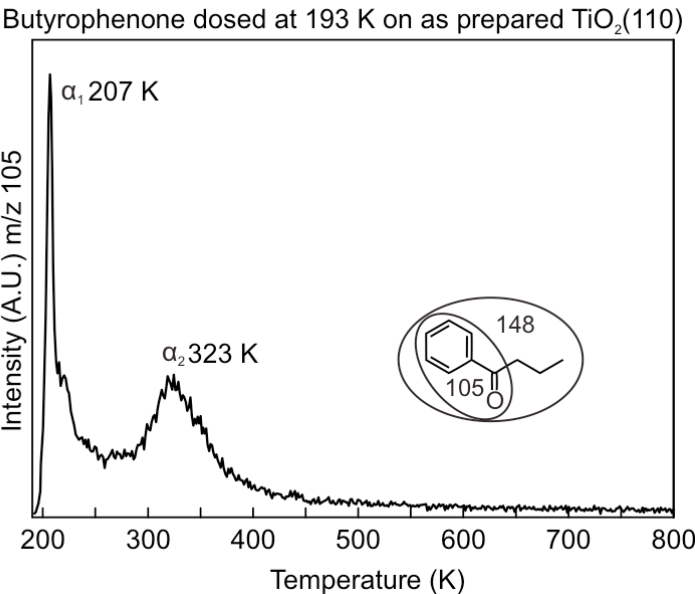

**Figure S1.** Temperature programmed reaction spectra of a multilayer coverage of butyrophenone on  $\text{TiO}_2(110)$ : multilayer,  $\alpha_1$ , and monolayer,  $\alpha_2$ , of butyrophenone on as-prepared  $r\text{-TiO}_2(110)$  dosed at 192K. The heating rate used was  $2\text{ K s}^{-1}$ .

| $m/z$ | NIST Database | $r\text{-TiO}_2(110)$ Multilayer | $r\text{-TiO}_2(110)$ Monolayer | $o\text{-TiO}_2(110)$ Multilayer | $o\text{-TiO}_2(110)$ Monolayer | $o\text{-TiO}_2(110)$ Butyrophenone-O Complex | $o\text{-TiO}_2(110)$ Monolayer after UV Irradiation |
|-------|---------------|----------------------------------|---------------------------------|----------------------------------|---------------------------------|-----------------------------------------------|------------------------------------------------------|
| 148   | 0.16          | 0.16                             | 0.12                            | 0.21                             | 0.16                            | 0.07                                          | ---                                                  |
| 120   | 0.99          | 0.08                             | 0.08                            | 0.08                             | 0.08                            | 0.05                                          | ---                                                  |
| 105   | 1.00          | 1.00                             | 1.00                            | 1.00                             | 1.00                            | 1.00                                          | 1.00                                                 |
| 78    | 0.05          | 0.08                             | 0.08                            | 0.06                             | 0.06                            | 0.07                                          | 0.05                                                 |
| 77    | 0.49          | 0.63                             | 0.66                            | 0.56                             | 0.63                            | 0.65                                          | 0.56                                                 |
| 51    | 0.15          | 0.37                             | 0.34                            | 0.26                             | 0.31                            | 0.34                                          | ---                                                  |
| 43    | 0.02          | 0.06                             | 0.05                            | 0.04                             | 0.07                            | 0.06                                          | 0.07                                                 |
| 27    | 0.04          | 0.27                             | 0.24                            | 0.14                             | 0.18                            | 0.25                                          | 0.13                                                 |

**Table S1.** Mass spectrometer fragments of butyrophenone desorbing from different desorption states on  $r\text{-TiO}_2(110)$  and  $o\text{-TiO}_2(110)$ . All intensities are with respect to the most intense fragment,  $m/z$  105. Fragments have been corrected for their transmission coefficient, multiplier gain, and ionization efficiency.

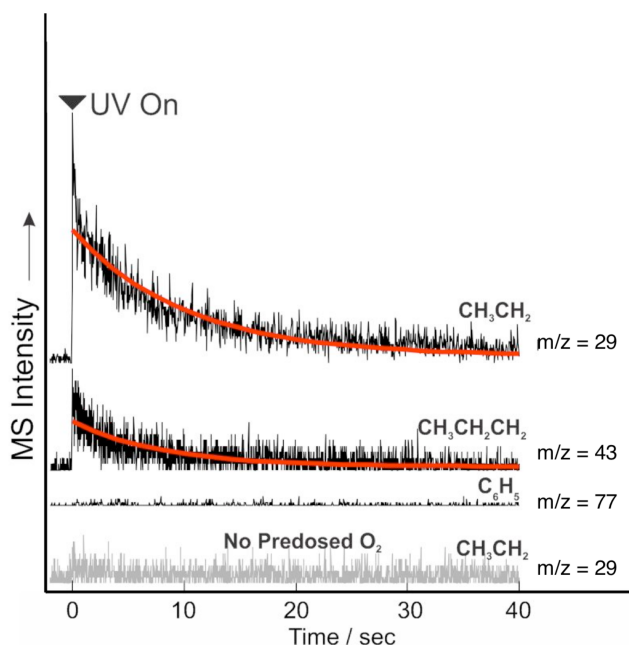

**Figure S2.** Photon-stimulated desorption (PSD) measurements of  $m/z$  29, 43, and 77 from butyrophenone on O<sub>2</sub>-predosed TiO<sub>2</sub>(110) as well as the PSD of  $m/z$  29 from butyrophenone on as-prepared TiO<sub>2</sub>(110) surface (grey). The triangle marks the start of a 5-minute UV-light irradiation performed at 300 K. (Only the first 40 seconds are shown here.) Mass 43 and 29, characteristic of a propyl fragment, are observed to desorb from oxidized TiO<sub>2</sub>(110) surface when irradiated while mass 77, characteristic of benzoate, does not. The decay of  $m/z$  29 and 43 on the pre-oxidized surface were fit to a single exponential and the fit parameters are shown in Table S1.

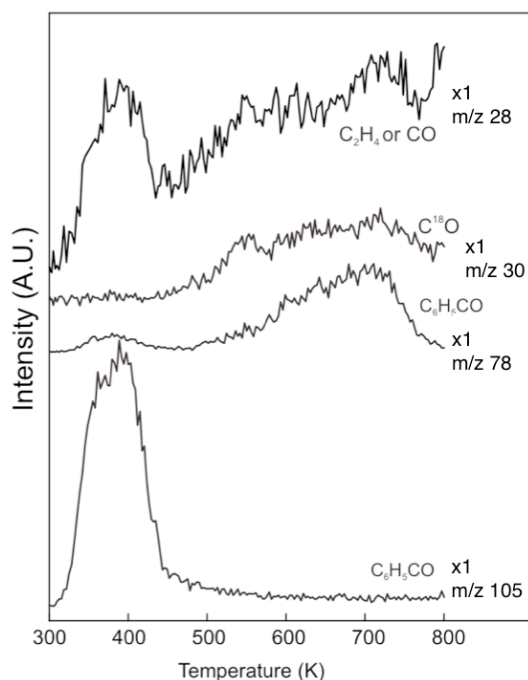

**Figure S3.** Temperature programmed reaction spectra of butyrophenone dosed on <sup>18</sup>O<sub>2</sub>-predosed surface at 300 K after 5 minutes UV photolysis.  $m/z$  30 evolves with  $m/z$  28 and 78, implying that mixing has occurred. There is no  $m/z$  30 for the same experiment on the <sup>16</sup>O<sub>2</sub>-predosed surface. The heating rate used was 2 K s<sup>-1</sup>. For this experiment, we used a Xe lamp with a bandwidth filter of 200–400 nm (92 mW/cm<sup>-2</sup> total flux).
